# Supplementary material
Source: publisher figshare collection journal article supplement (https://acs.figshare.com/ndownloader/files/22814135)
Supplement: Supplementary file 1 [file 22814135]

## Development and Execution of a Production-Scale Continuous [2+2] Photocycloaddition

Matthew G. Beaver, En-xuan Zhang, Zhi-qing Liu, Song-yuan Zheng, Bin Wang, Jiang-ping Lu, Jian Tao, Miguel Gonzalez, Siân Jones, Jason S. Tedrow

*Process Development, Amgen, Inc. 360 Binney Street, Cambridge, Massachusetts 02142 (USA)*

*Asymchem Life Science (Tianjin) Co., Ltd., No. 71 Seventh Avenue, TEDA, Tianjin 300457, China.*

### Supporting Information

#### Table of Contents

|     |                                        |     |
|-----|----------------------------------------|-----|
| I.  | Details of crystallization development | S-1 |
| II. | Analytical Methods                     | S-5 |

#### I. Details of crystallization development

Preliminary optimization efforts included dissolution of a crude reaction sample from the 500 g/day demonstration in a minimal volume of toluene or acetone at elevated temperatures followed by addition of an antisolvent and cooling (as noted). Table S1 details the results of these trials.

**Table S1:** Evaluation of conditions for crystallization of cyclobutane **2**.

| Solvent system                   | Temperature | Potency (wt%) | Purity (GC area%) | Recovery | Appearance          |
|----------------------------------|-------------|---------------|-------------------|----------|---------------------|
| 1 V Tol. / 1 V c-Hex             | 20 °C       | 89            | 98.4              | 72.2%    | Sticky yellow solid |
| 1 V Tol. / 1 V c-Hex             | 10 °C       | 86            | 97.0              | 74%      | yellow solid        |
| 2 V Tol. / 2 V c-Hex             | 10 °C       | 88            | 97.7              | 76.3%    | yellow solid        |
| 3 V Tol. / 3 V c-Hex             | 10 °C       | 86            | 93.5              | 56%      | yellow solid        |
| 2 V Tol. / 2 V Bu <sub>2</sub> O | 10 °C       | 90            | 91.6              | 49%      | yellow solid        |
| 2 V Tol. / 2 V Bu <sub>2</sub> O | 20 °C       | 91            | 96.3              | 39.3%    | yellow solid        |
| 3 V Tol. / 3 V Bu <sub>2</sub> O | 10 °C       | 96            | 98.8              | 49.4%    | white solid         |
| 2 V Tol. / 2 V MTBE              | 10 °C       | 93            | 96.8              | 45.3%    | white solid         |
| 1 V Tol. / 2 V Bu <sub>2</sub> O | 10 °C       | 78            | 86.7              | 55.3%    | yellow solid        |

| Solvent system                                  | Temperature | Potency (wt%) | Purity (GC area%) | Recovery | Appearance        |
|-------------------------------------------------|-------------|---------------|-------------------|----------|-------------------|
| 1 V Tol. / 2 V MTBE                             | 10 °C       | 97            | 99.6              | 48.8%    | white solid       |
| 1 V Tol. / 2V ( <i>i</i> -Pr) <sub>2</sub> O    | 10 °C       | 86            | 95.3              | 51.4%    | Yellow solid      |
| 1 V Tol. / 1 V ( <i>i</i> -Pr) <sub>2</sub> O   | 10 °C       | 90            | 98.9              | 56.7%    | Yellow solid      |
| 1 V Tol. / 1 V MTBE                             | 10 °C       | 96            | 98.8              | 48.1%    | White solid       |
| 0.5 V Tol. / 2 V ( <i>i</i> -Pr) <sub>2</sub> O | 10 °C       | 96            | 99.5              | 52.3%    | Yellow solid      |
| 0.5 V Tol. / 1 V ( <i>i</i> -Pr) <sub>2</sub> O | 10 °C       | 73            | 76.2              | 71.6%    | Yellow solid      |
| 0.5 V Tol. / 1 V MTBE                           | 10 °C       | 93            | 99.1              | 53.5%    | White solid       |
| 1 V Tol. / 2 V MTBE                             | −10 °C      | 97            | 96.2              | 62.5%    | White solid       |
| 1 V Tol. / 2 V MTBE                             | −20 °C      | 92            | 92.8              | 60.1%    | White solid       |
| 0.5 V Tol. / 6 V MTBE                           | −20 °C      | 89            | 93.0              | 65.8%    | White solid       |
| 0.5 V Tol. / 6 V MTBE                           | −10 °C      | 97            | 96.1              | 63.7%    | White solid       |
| 0.5 V Tol. / 4 V MTBE                           | −10 °C      | 94            | 95.2              | 65.7%    | White solid       |
| 0.5 V Acetone / 4 V MTBE                        | −10 °C      | 96            | 99.7              | 68.9%    | White solid       |
| 0.5 V Acetone / 6 V MTBE                        | −10 °C      | 96            | 99.2              | 62.0%    | White solid       |
| 3 V MTBE / 3 V MTBE                             | −10 °C      | 94            | 97.9              | 66.0%    | Pale yellow solid |
| 0.5 V Acetone / 4 V MTBE                        | −20 °C      | 94            | 98.2              | 65.2%    | White solid       |
| 0.2 V Acetone / 4 V MTBE                        | −20 °C      | 95            | 98.4              | 63.0%    | White solid       |
| 0.2 V Acetone / 4 V MTBE                        | −10 °C      | 93            | 98.1              | 67.2%    | White solid       |
| 0.2 V Acetone / 2 V EA                          | −20 °C      | 95            | 95.3              | 59.6%    | Red sticky solid  |
| 0.2 V Acetone / 2 V IPAc                        | −20 °C      | 95            | 98.0              | 72.1%    | White solid       |
| 0.2 V Acetone / 4 V MTBE                        | −20 °C      | 95            | 97.4              | 68.5%    | White solid       |
| 0.2 V Acetone / 4 V EA                          | −20 °C      | 97            | 97.9              | 40.2%    | White solid       |
| 0.2 V Acetone / 6 V EA                          | −20 °C      | 97            | 97.1              | 38.2%    | White solid       |
| 0.2 V Acetone / 4 V IPAC                        | −20 °C      | 94            | 97.6              | 64.2%    | White solid       |
| 0.2 V Acetone / 6 V IPAc                        | −20 °C      | 97            | 98.8              | 51.9%    | White solid       |

| Solvent system           | Temperature | Potency (wt%) | Purity (GC area%) | Recovery | Appearance  |
|--------------------------|-------------|---------------|-------------------|----------|-------------|
| 0.2 V Acetone / 4 V EA   | −35 °C      | 97            | 97.2              | 52.8%    | White solid |
| 0.2 V Acetone / 4 V IPAc | −35 °C      | 97            | 98.5              | 60.4%    | White solid |
| 0.5 V Acetone / 6 V MTBE | −20 °C      | 91            | 97.9              | 67.3%    | White solid |
| 3 V Acetone              | −30 °C      | 97            | 98.4              | 38.2%    | White solid |
| 0.2 V Acetone / 4 V MTBE | −30 °C      | 94            | 98.6              | 61.0%    | White solid |
| 0.5 V Acetone / 4 V MTBE | −30 °C      | 93            | 98.8              | 64.3%    | White solid |
| 1 V Acetone / 4 V MTBE   | −30 °C      | 92            | 98.9              | 57.2%    | White solid |
| 1 V Acetone / 6 V MTBE   | −30 °C      | 90            | 99.0              | 51.6%    | White solid |
| 1 V Acetone / 6 V MTBE   | −20 °C      | 92            | 99.1              | 52.8%    | White solid |

As described in the main text, an updated isolation protocol was designed to remove the insoluble impurity responsible for the low potency of isolated solids. Tables S2 and S3 provides representative examples of this optimization effort utilizing isolation methods 1 and 2, respectively.

**Table S2:** Experimental data for isolation by method 1.

**Method 1:** Crude product was dissolved in toluene (5 L/kg) at the noted temperature and the insoluble solid was filtered. The filtrate was concentrated and then recrystallized from toluene and MTBE or cyclohexane and was filtered at the noted temperature.

| Filtration temp (°C) | Product losses (%) | Solvent system                     | Potency (wt%) | Purity (GC area%) | Recovery |
|----------------------|--------------------|------------------------------------|---------------|-------------------|----------|
| 22                   | 24                 | Did not proceed due to high losses |               |                   |          |
| 40                   | 3.2                | 2 V Tol. / 2 V c-Hex               | 92            | 96.8              | 78%      |
| 30                   | 2.3                | 0.5 V Tol. / 2.5 V MTBE            | 95            | 98.3              | 80%      |
| 35                   | 1.3                | 0.5 V Tol. / 2.5 V MTBE            | 95            | 98.3              | 80%      |
| 30                   | 3.0                | 1 V Tol. / 2.5 V MTBE              | 97            | 98.4              | 80%      |

**Table S3:** Experimental data for isolation by method 2.

**Method 2:** Crude product was dissolved in toluene (1 L/kg) and MTBE (2.5 L/kg) at 60 °C and the insoluble solid was filtered. The filtrate was cooled to the noted temperature, filtered, and washed with MTBE (2 L/kg).

| Filtration temp (°C) | Product losses (%) | Recrystallization temperature (°C) | Potency (wt%) | Purity (GC area%) | Recovery |
|----------------------|--------------------|------------------------------------|---------------|-------------------|----------|
| 60                   | 2.3                | −15                                | 98            | 98.1              | 80%      |
| 60                   | 2.4                | −20                                | 97            | 97.0              | 76%      |
| 60                   | 2.4                | −15                                | 96            | 97.8              | 84%      |
| 60                   | 2.9                | −5                                 | 98            | 99.0              | 80%      |
| 60                   | 3.4                | 0                                  | 98            | 99.1              | 78%      |

## II. Analytical Methods

### ***GC method for IPC and product purity:***

|                      |                                                                     |
|----------------------|---------------------------------------------------------------------|
| Column style         | HP-5, 30 m*0.32 mm*0.25 um                                          |
| Temp. Program:       | 50°C hold for 2 min,<br>Ramp at 20°C /min to 260°C, hold for 10 min |
| Injector temperature | 250°C;                                                              |
| Detector temperature | FID Detector, 300°C;                                                |
| Run time             | 22.5 min                                                            |
| Carrier gas          | He                                                                  |
| Column flow          | 3.0 mL/min, constant flow                                           |
| Split ratio          | 30:1                                                                |
| Hydrogen flow        | 40 mL/min                                                           |
| Air flow             | 400 mL/min                                                          |
| N <sub>2</sub> flow  | 25 mL/min                                                           |
| Make-up gas          | N <sub>2</sub>                                                      |

### ***q-NMR for product potency:***

Deuterated solvent: Acetone

Internal standard sample: 1,3,5-trimethoxybenzene
